# Supplementary material for: Optical Fiber Ball Resonator Sensor Spectral Interrogation through Undersampled KLT: Application to Refractive Index Sensing and Cancer Biomarker Biosensing
Source: MDPI journal article supplement (doi:10.3390/s21206721), 2021-10-10
Supplement: s1 [file s1]

# Optical fiber ball resonator sensor spectral interrogation through undersampled KLT: application to refractive index sensing and cancer biomarker biosensing

Daniele Tosi <sup>1,2,\*</sup>, Zhannat Ashikbayeva <sup>1</sup>, Aliya Bekmurzayeva <sup>1,2</sup>, Zhuldyz Myrkhiyeva <sup>1</sup>, Aida Rakhimbekova <sup>1</sup>, Takhmina Ayupova<sup>1</sup>, and Madina Shaimerdenova <sup>1</sup>

<sup>1</sup>Nazarbayev University, School of Engineering and Digital Sciences, 010000 Nur-Sultan, Kazakhstan  
<sup>2</sup>National Laboratory Astana, Laboratory of Biosensors and Bioinstruments, 010000 Nur-Sultan, Kazakhstan  
\*Correspondence: daniele.tosi@nu.edu.kz;

**Table S1.** The fabrication parameters of the ball resonator using CO<sub>2</sub> laser splicer (Fujikura LZM-100). Pre-heat value and the power levels are reported in bit units, as displayed on the splicer.

| Parameters               | Diameters<br>(x, y axes),<br>μm |
|--------------------------|---------------------------------|
|                          | 490-484                         |
| Pre-heat (bit)           | 1                               |
| Absolute power (bit)     | 342                             |
| Relative power (bit)     | 90                              |
| Break-add power (bit)    | 100                             |
| Feeding speed (mm/sec)   | 0.2                             |
| Rotator speed (deg./sec) | 180                             |
| Diameter adjustment (μm) | -10                             |
